# Supplementary material for: Three-dimensional induction of dorsal, intermediate and ventral spinal cord tissues from human pluripotent stem cells
Source: PubMed Central journal article supplement (PMC6124545; doi:10.1242/dev.162214), 2018-07-30
Supplement: develop-145-162214-s1.pdf [file develop-145-162214-s1.pdf]

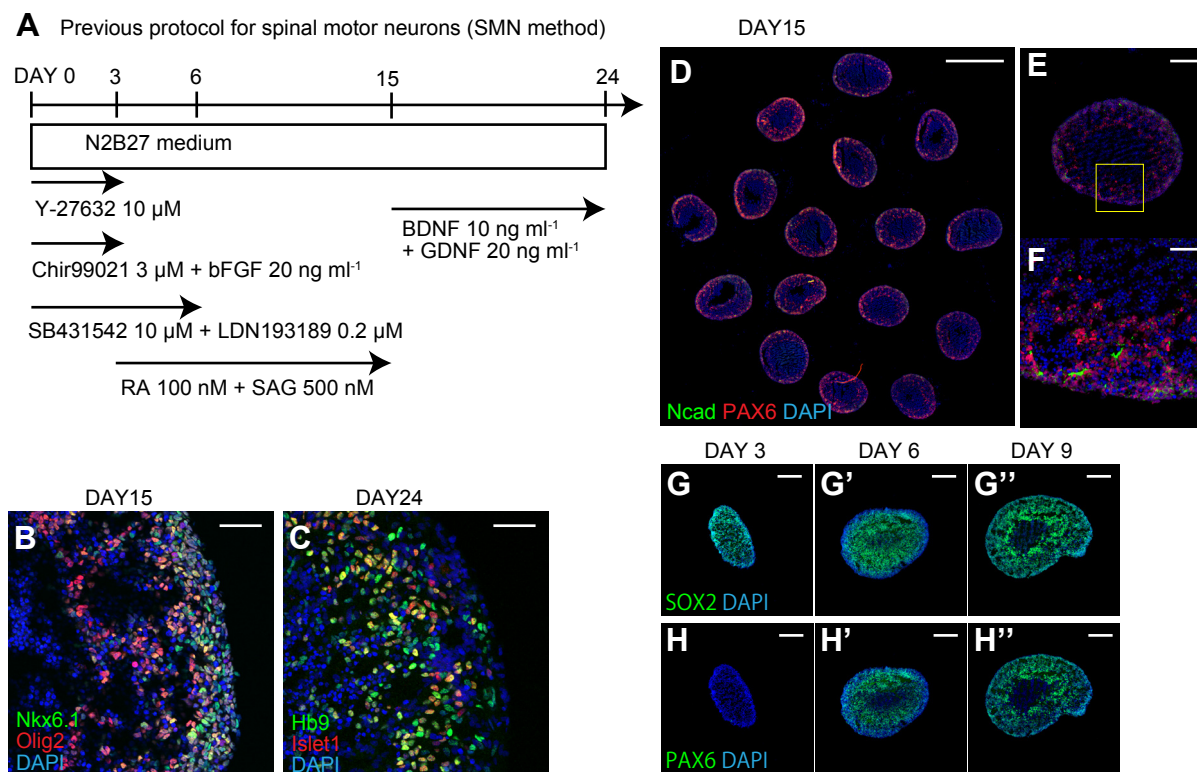

**Fig. S1 Generation of spinal motor neurons using a previously described protocol.**

(A) Schematic of the differentiation protocol for spinal motor neurons (SMN protocol). (B) Nkx6.1<sup>+</sup>/Olig2<sup>+</sup> spinal motor neuron progenitors were efficiently generated on day 15. (C) Hb9<sup>+</sup>/Islet1<sup>+</sup> spinal motor neuron precursors were efficiently generated on day 24. (D-F) The expression of N-cadherin was observed in a discontinuous manner. (G-H'') SOX2<sup>+</sup>/PAX6<sup>+</sup> rosette-like structure formation was observed up to day 9. Scale bars: 1000  $\mu\text{m}$  (D); 200  $\mu\text{m}$  (E, G-H''); 50  $\mu\text{m}$  (B, C, F).

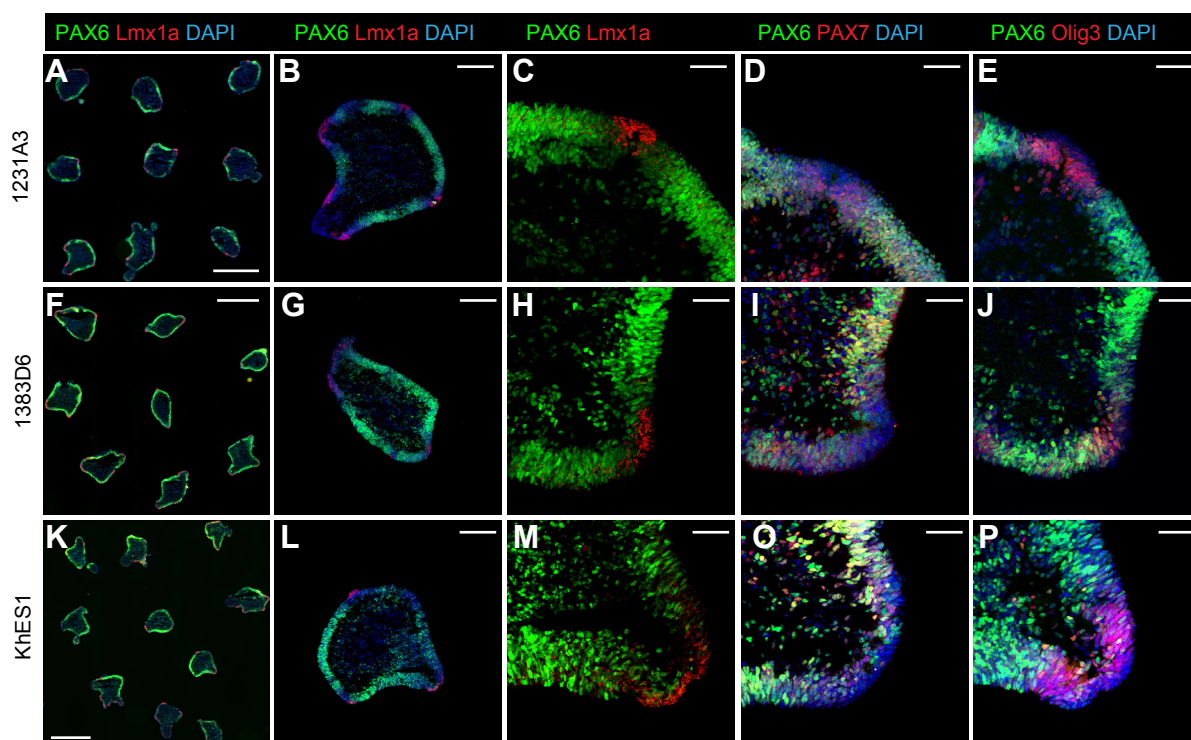

**Fig. S2 Induction of dorsal spinal cord-like tissues from other hPSC lines.** Dorsal spinal cord-like tissues could be induced using other human iPS cell lines (1231A1 (A-E), 1383D6 (F-J)) and a human ES cell line (KhES1 (K-P)). Continuous epithelium structure expressed PAX6 (A, E, I). Lmx1a<sup>+</sup> domains were induced in PAX6<sup>-</sup> regions (A-C, F-H, K-M). PAX6<sup>+</sup> continuous epithelium co-expressed PAX7 (D, I, Q). Olig3<sup>+</sup> domains were induced adjacent to Lmx1a<sup>+</sup> regions (E, J, P). These structures were observed in 90.9% (1231A3), 83.3% (1383D6) and 57.5% (KhES1) of the analyzed aggregates in 3 independent experiments. Scale bars: 1000 $\mu$ m (A, F, K); 200  $\mu$ m (B, G, L); 50  $\mu$ m (C-E, H-J, M-P).

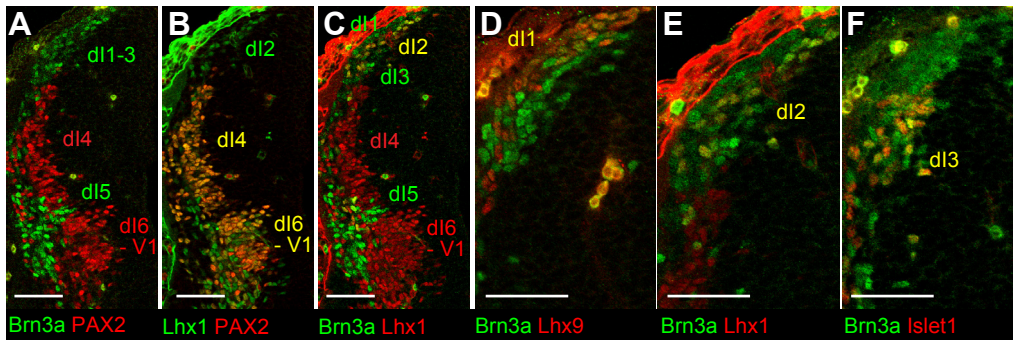

**Fig. S3. Expression pattern of dorsal interneuron markers in mouse embryo E11.5.** (A) Brn3a<sup>+</sup> population and PAX2<sup>+</sup> population exhibited separate distributions. (B) Lhx1<sup>+</sup>/PAX2<sup>+</sup> population was observed in the dorsal side and ventral side. (C) Lhx1<sup>+</sup> cells in the dorsal side co-expressed Brn3a. (D-F) Among Brn3a<sup>+</sup> cells, Lhx9<sup>+</sup> cells (D), Lhx1<sup>+</sup> cells (E), and Islet1<sup>+</sup> cells (F) were dl1, dl2 and dl3, respectively. Scale bars:100  $\mu$ m (A-C); 50  $\mu$ m (D-F).

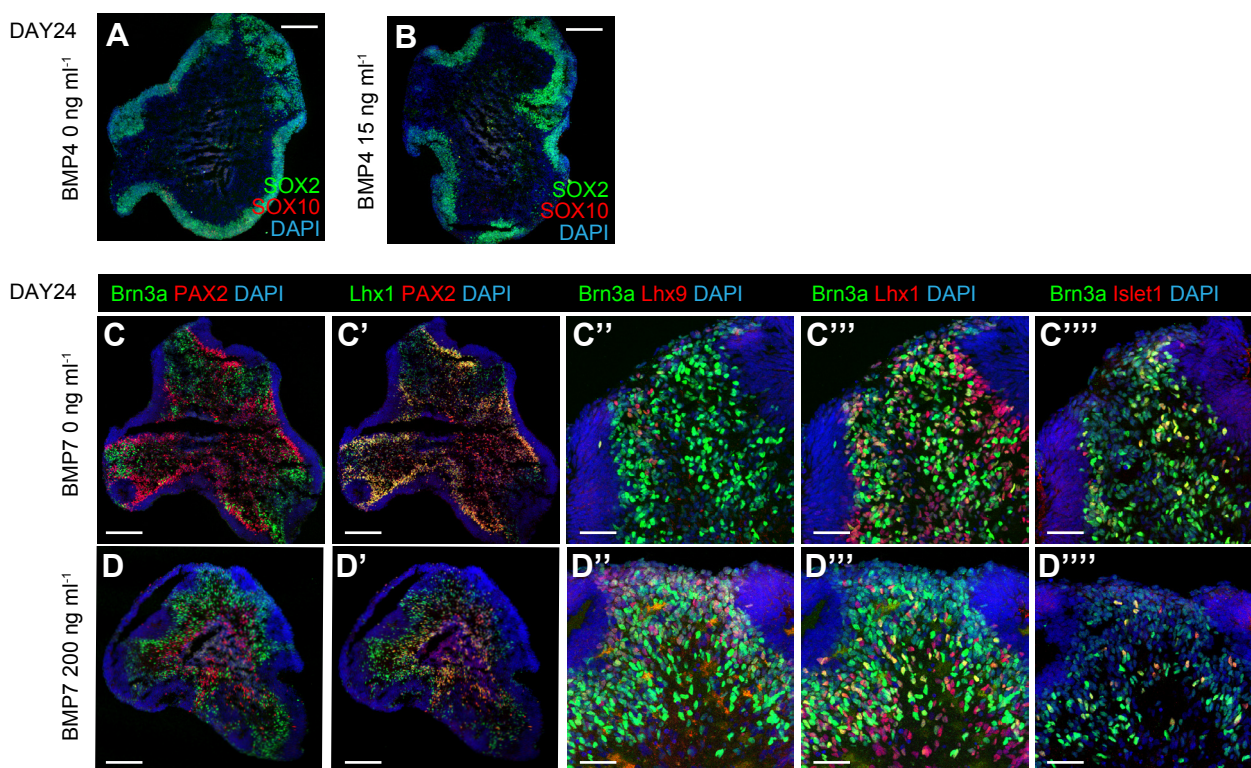

**Fig. S4. BMP treatment dorsalized the identity of spinal cord-like tissues.**

(A, B) Immunostaining for SOX2 and SOX10 on day 24 under BMP4 0 ng ml<sup>-1</sup> (A) and BMP4 15 ng ml<sup>-1</sup> (B). SOX2 was expressed in the epithelial structure, but SOX10<sup>+</sup> cells were rarely detected in (A). BMP4 treatment did not increase SOX10<sup>+</sup> cells. (C-C'''' ) Immunostaining under BMP7 0 ng ml<sup>-1</sup> on day 24. (C) Brn3a<sup>+</sup> and PAX2<sup>+</sup> cell populations were detected. (C' ) PAX2<sup>+</sup> populations co-expressed Lhx1, suggesting the generation of dl4 or dl6. (C'' -C'''' ) Lhx9<sup>+</sup>/Brn3a<sup>+</sup>, Lhx1<sup>+</sup>/Brn3a<sup>+</sup>, Islet1<sup>+</sup>/Brn3a<sup>+</sup> populations were detected, suggesting the generation of dl1, dl2 and dl3 respectively. (D-D'''' ) Immunostaining under BMP7 200 ng ml<sup>-1</sup> on day 24. (D) Brn3a<sup>+</sup> populations were mainly generated. (D' ) PAX2<sup>+</sup>/Lhx1<sup>+</sup> (dl4/6) cells were decreased compared with BMP7 0 ng ml<sup>-1</sup>. (D'' -D'''' ) Lhx9<sup>+</sup>/Brn3a<sup>+</sup> (dl1), Lhx1<sup>+</sup>/Brn3a<sup>+</sup> (dl2) cells were mainly generated, while only a few number of Islet1<sup>+</sup>/Brn3a<sup>+</sup> (dl3) cells were detected. Scale bars: 200  $\mu$ m (A, B, C, C' , D, D' ); 50  $\mu$ m (C'' -C'''' , D'' -D'''' ).





### Fig. S5. Examination of the interplay between BMPs and RA

(A, B) The role of RA between days 15 and 24 were examined under BMP4 0 ng ml<sup>-1</sup> condition. (A-A''') Immunostaining under RA 100 nM on day 24. (A) Brn3a<sup>+</sup> and PAX2<sup>+</sup> cell populations were generated. (A') PAX2<sup>+</sup> populations co-expressed Lhx1, suggesting the generation of dl4 or dl6. (A'', A''') Lhx9<sup>+</sup>/Brn3a<sup>+</sup> cells were detected, suggesting the generation of dl1. (B-B''') Immunostaining under RA 0 nM on day 24. (B, B') Compared with RA 100 nM, Brn3a<sup>+</sup> cells were increased, while PAX2<sup>+</sup>/Lhx1<sup>+</sup> (dl4/6) cells were decreased. (B'', B''') Lhx9<sup>+</sup>/Brn3a<sup>+</sup> (dl1) cells were increased. (C, D) The role of RA between days 15 and 24 was examined under BMP4 15 ng ml<sup>-1</sup> condition. (C-C''') Immunostaining under RA 100 nM on day 24. (C) Brn3a<sup>+</sup> cells were mainly generated, while few PAX2<sup>+</sup> cells were observed. (C' -C''') Lhx9<sup>+</sup>/Brn3a<sup>+</sup> (dl1) and Lhx1<sup>+</sup>/Brn3a<sup>+</sup> (dl2) cells were generated. (D-D''') Immunostaining under RA 0 nM on day 24. (D) Brn3a<sup>+</sup> cells were mainly generated. (D' -D''') Lhx9<sup>+</sup>/Brn3a<sup>+</sup>(dl1) cells were mainly generated, while few Lhx1<sup>+</sup>/Brn3a<sup>+</sup> (dl2) cells were detected. (E) Schematic summary of the examined conditions. Scale bars: 200 μm (A-A'', B-B'', C, C', D, D'); 50 μm (A''', B''', C'', C''', D'', D''').

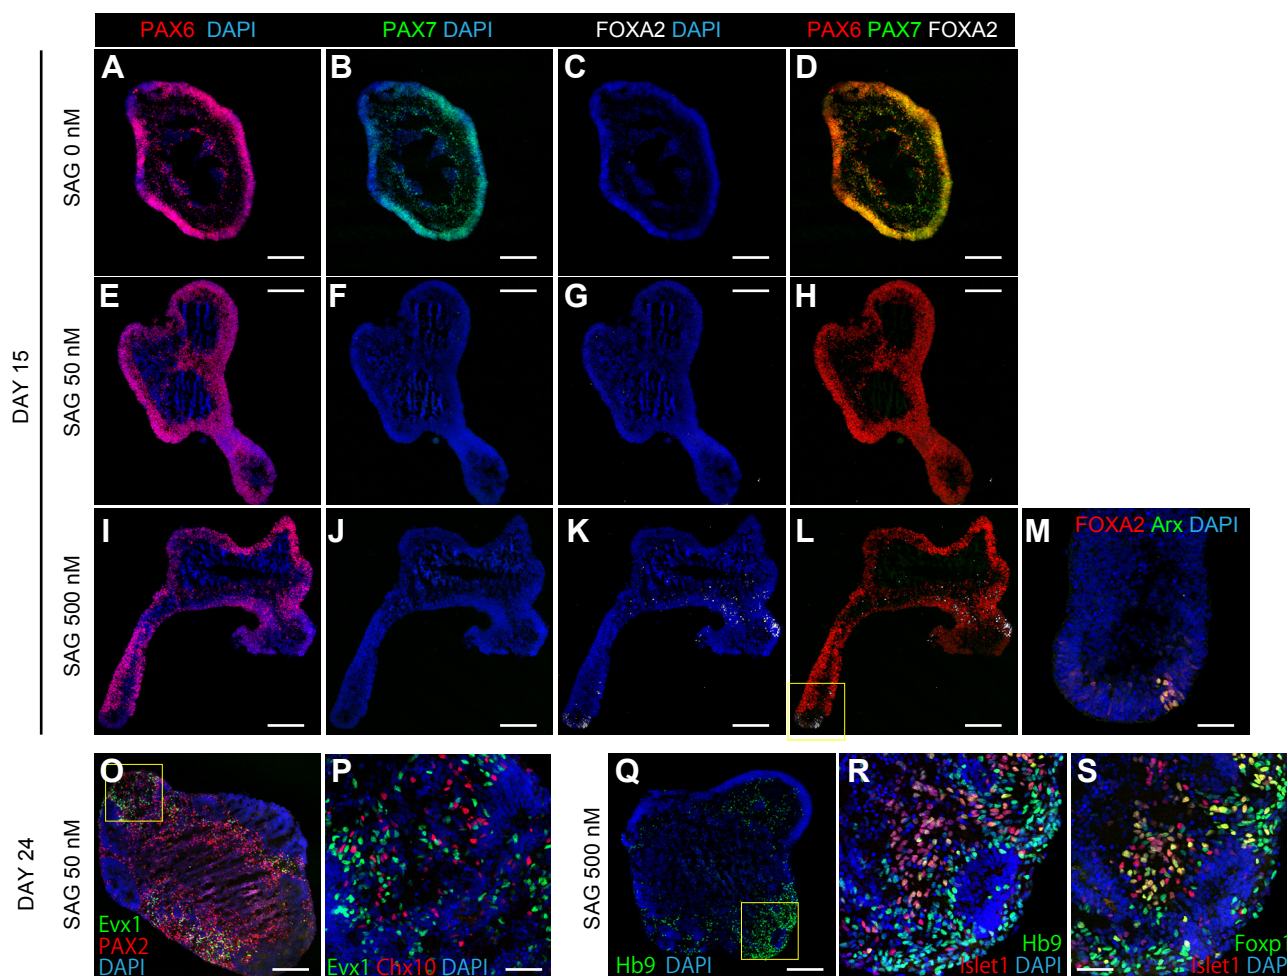

**Fig. S6. Spinal cord-like tissues were ventralized by activating Shh signaling in a dose-dependent manner.** (A-D) Under SAG 0 nM, continuous epithelium expressed both PAX6 (A) and PAX7 (B) but not FOXA2 (C, D). (E-H) Under SAG 50 nM, continuous epithelium expressed PAX6 (E), but not PAX7 (F) or FOXA2 (G, H). (I-L) Under SAG 500 nM, continuous epithelium partially expressed PAX6 (I), but not PAX7 (J). FOXA2 expression was also observed (K, L), suggesting the generation of the ventral-most part of the spinal cord. (M) Some of FOXA2<sup>+</sup> cells co-expressed Arx, suggesting the presence of definitive floor plate. (O) Evx1<sup>+</sup> cells were observed on day 24 under SAG 50 nM condition, suggesting the generation of V0. (P) Chx10<sup>+</sup> cells were detected, suggesting the generation of V2a. (Q, R) Hb9<sup>+</sup>, Islet1<sup>+</sup> and Hb9<sup>+</sup>/Islet1<sup>+</sup> cells were generated on day 24 under SAG 500 nM condition. (R) FOXP1<sup>+</sup> cells were observed, suggesting the generation of lateral motor column motor neurons. Scale bars: 200  $\mu$ m (A-L, O, Q); 50  $\mu$ m (M, P, R, S).

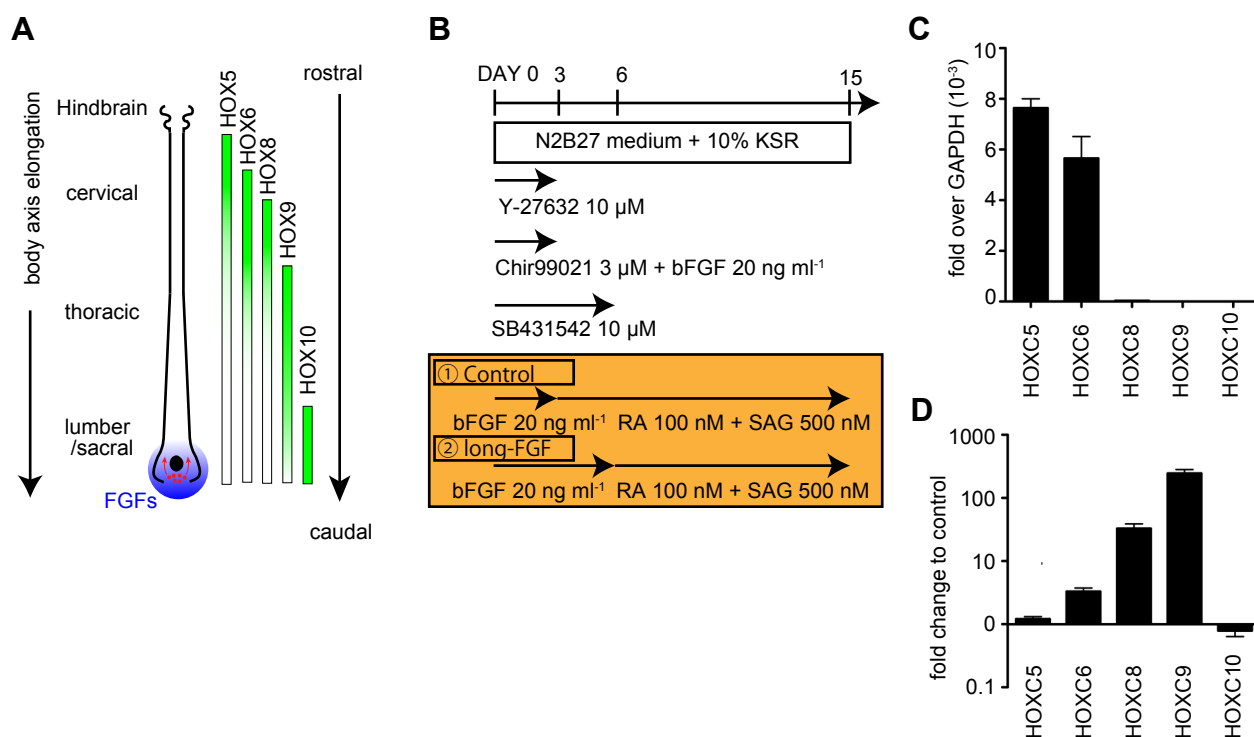

**Fig. S7. Evaluation of positional identities along rostro-caudal axis.** (A) Schematic showing the expression pattern of HOX gene along the R-C axis. (B) Schematic of the examined conditions. (C) qPCR analysis on day 15 showing the expression of HOX genes under control conditions (n=5 total RNA samples from 3 independent culture experiments) (D) qPCR analysis on day 15 showing the relative expression of HOX genes under long FGF treatment conditions compared to control conditions (n=5 total RNA samples from 3 independent culture experiments). HOXC8 and HOXC9 were upregulated, while HOXC10 was not. Each bar represents s.e.m.



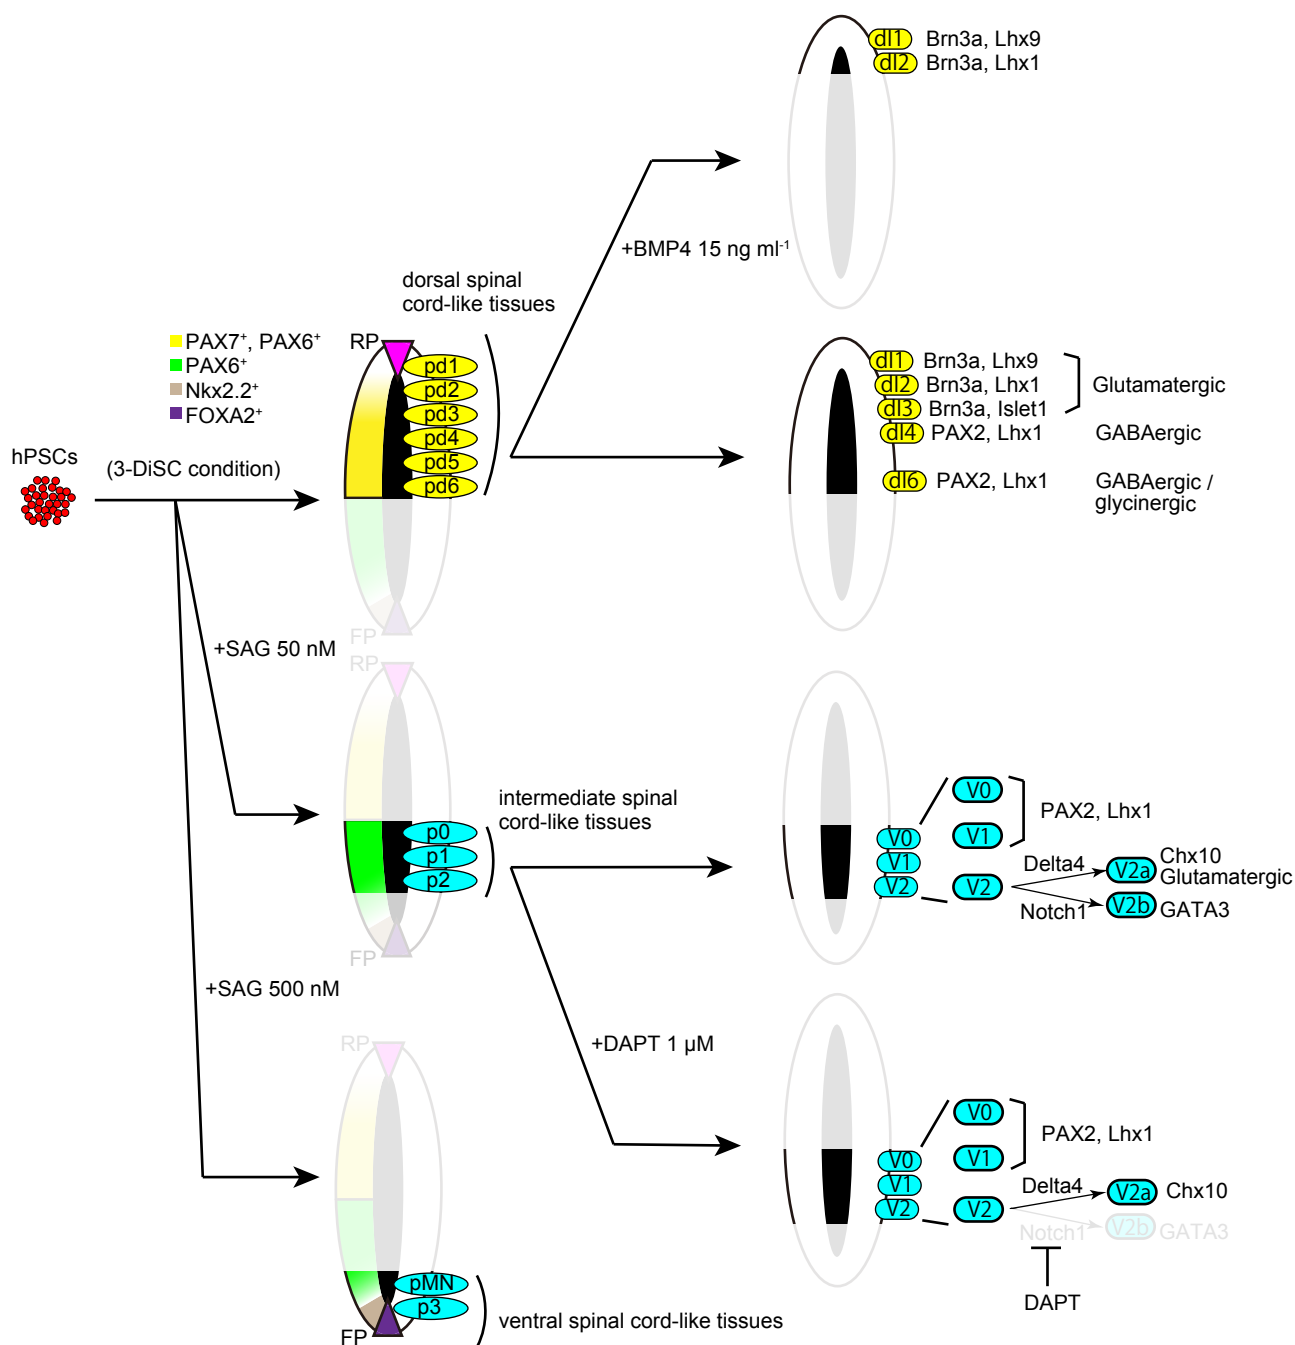

**Fig. S8. Schematic summary of examined conditions for 3D spinal cord tissues.**

**Table. S1. List of primary antibodies and their dilutions for Immunostaining**

| Antibodies      | Company          | Catalog#  | Host spices | Dilution |
|-----------------|------------------|-----------|-------------|----------|
| Arx             | R&D              | AF7068    | Sheep       | 1:100    |
| PKC $\zeta$     | SantaCruz        | sc-216    | Rabbit      | 1:100    |
| Brachyury       | R&D              | AF2085    | Goat        | 1:200    |
| Brn3a           | SantaCruz        | sc-31984  | Goat        | 1:250    |
| Calbindin       | Swant            | D-28K     | Mouse       | 1:1000   |
| ChAT            | Millipore        | AB144P    | Goat        | 1:200    |
| Chx10           | Santa Cruz       | sc-21690  | Goat        | 1:500    |
| Dbx1            | Sigma            | HPA039802 | Rabbit      | 1:100    |
| Evx1            | DSHB             | 99.1-3A2  | Mouse       | 1:100    |
| FOXA2           | Santa Cruz       | sc-6554   | Goat        | 1:500    |
| FOXP1           | Abcam            | ab32010   | Mouse       | 1:500    |
| FOXP2           | Abcam            | ab16046   | Rabbit      | 1:4000   |
| GABA            | Millipore        | MAB316    | Mouse       | 1:250    |
| GABA            | Sigma            | A2052     | Rabbit      | 1:2000   |
| GAD67           | Millipore        | MAB5406   | Mouse       | 1:1000   |
| GATA3           | R&D              | MAB6330   | Mouse       | 1:500    |
| GFAP            | Santa Cruz       | sc-6170   | Goat        | 1:500    |
| Hb9             | DSHB             | 81.5C10   | Mouse       | 1:100    |
| Islet1          | Sigma            | HPA057416 | Rabbit      | 1:500    |
| Lhx1            | DSHB             | 4F2       | Mouse       | 1:100    |
| Lhx9            | Sigma            | HPA009695 | Rabbit      | 1:100    |
| Lmx1a           | Sigma            | HPA030088 | Rabbit      | 1:2000   |
| MafB            | Sigma            | HPA005653 | Rabbit      | 1:250    |
| MSX1/2          | DSHB             | 4G1       | Mouse       | 1:200    |
| N-cadherin      | BD               | 610920    | Mouse       | 1:1000   |
| Nkx2.2          | DSHB             | 74.5A5    | Mouse       | 1:100    |
| Nkx6.1          | DSHB             | F55A12    | Mouse       | 1:100    |
| Olig2           | Millipore        | AB9610    | Rabbit      | 1:1000   |
| Olig3           | Sigma            | HPA018303 | Rabbit      | 1:100    |
| PAX2            | Covance          | PRB-276P  | Rabbit      | 1:500    |
| PAX6            | BD               | 561462    | Mouse       | 1:500    |
| PAX6            | Covance          | PRB-278P  | Rabbit      | 1:500    |
| PAX7            | DSHB             | PAX7      | Mouse       | 1:100    |
| phospho-SMAD1/5 | Cell Signaling   | 9516      | Rabbit      | 1:500    |
| SOX1            | R&D              | AF3369    | Goat        | 1:1000   |
| SOX2            | SantaCruz        | sc-17320  | Goat        | 1:500    |
| SOX2            | Abcam            | ab97959   | Rabbit      | 1:500    |
| SOX10           | Abcam            | ab108408  | Rabbit      | 1:500    |
| Tuj1            | Tuj1             | MMS435P   | Mouse       | 1:1000   |
| Tuj1            | Tuj1             | PRB-435P  | Rabbit      | 1:1000   |
| Vglut2          | R&D              | MAB5504   | Mouse       | 1:200    |
| Vglut2          | Synaptic Systems | 135 404   | Guinea Pig  | 1:1000   |
| Wnt1            | Abcam            | ab15251   | Rabbit      | 1:500    |

**Table. S2. List of genes and their primer sequences for qPCR analysis**

| Gene   | Forward (5' -3' )       | Reverse (5' -3' )     |
|--------|-------------------------|-----------------------|
| Brn3a  | CTCCCTGAGCACAAGTACCC    | TGAAAGGATGGCTCTTGCCC  |
| Dbx1   | GTACATCAGCAAGCCCGACC    | AGTTCCGCCATTTTCATGCGT |
| Dbx2   | CCCAACAGCACTCAAGTCCA    | AGCCCCAGTAAGTACACCCT  |
| FOXA2  | TTCAGGCCCGGCTAACTCT     | AGTCTCGACCCCCACTTGCT  |
| HOXC5  | GAGGAGCGAGCTAAGAGCAG    | GTGGCTCATGTGCAGTTTGG  |
| HOXC6  | ACAGACCTCAATCGCTCAGG    | GTACCGCGAGTAGATCTGGC  |
| HOXC8  | CCTCCGCCAACACTAACAGT    | AAACATGAGGCTGGGAGACG  |
| HOXC9  | CGTGGACTCGCTCATCTCTC    | AAAATCGCTACAGTCCGGCA  |
| HOXC10 | AGTGACTTCAATTGCGGGT     | GATAGGTGTTGAGGGCGAGG  |
| Lbx1   | CGCCAGCAAGACGTTTAAG     | CTGCCCAAAGATGGTCATAC  |
| Lmx1a  | TCAGAAGGGTGATGAGTTTGTCC | GGGGCGCTTATGGTCCTTG   |
| Nkx2.2 | AAACCATGTACGCGCTCA      | GGCGTTGACTGCATGTGCT   |
| Nkx6.1 | CACACGAGACCCACTTTTTCC   | CCCAACGAATAGGCCAAACG  |
| Olig2  | GGGCCACAAGTTAGTTGGAA    | GAGGAACGGCCACAGTTCTA  |
| Olig3  | CCTGCTCGCCAGAACTACA     | CCCCATAGATCTCGCCAACC  |
| PAX6   | TCTTTGCTTGGGAAATCCG     | CTGCCCGTTCAACATCCTTAG |
| PAX7   | CTTCAGTGGGAGGTCAGGTT    | CAAACACAGCATCGACGG    |
| GAPDH  | GGTCGGAGTCAACGGATTG     | TCAGCCTTGACGGTGCCATG  |

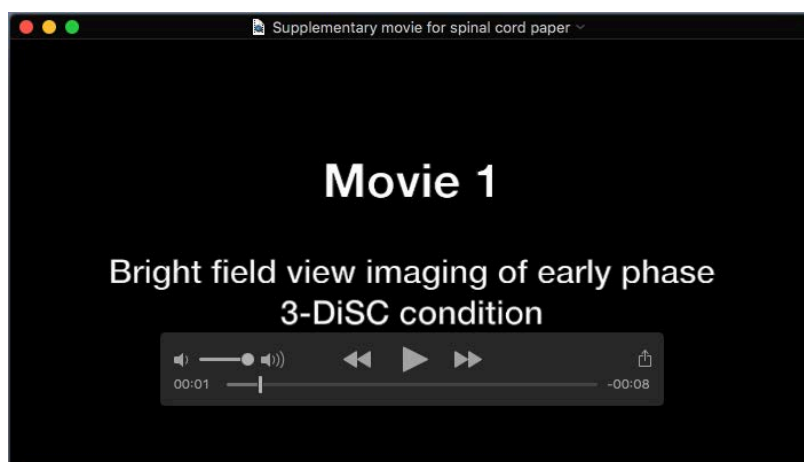

### Movie 1. Bright field view imaging of early phase 3-DiSC condition

The original imaging data were taken by using the IncuCyte S3 Live Cell Imaging System every 2 hours for 66 hours during tissue differentiation under 3-DiSC condition. After seeding hPSCs to each well of a U-bottomed 96-well plate, a cell aggregate became obvious from 10 hours after the start of differentiation. Some cells were not included in the aggregate and remained around the aggregate. Scale bar: 400  $\mu\text{m}$ .
